# Supplementary material for: Te-doped-WSe2/W as a stable monolith catalyst for ampere-level current density hydrogen evolution reaction
Source: Royal Society of Chemistry journal article supplement (doi:10.1039/d3cp05790a), 2024-01-01
Supplement: d3cp05790a1.pdf [file d3cp05790a1.pdf]

## Supporting Information

### Te-doped-WSe<sub>2</sub>/W as a Stable Monolith Catalyst for Ampere-Level Current Density Hydrogen Evolution Reaction

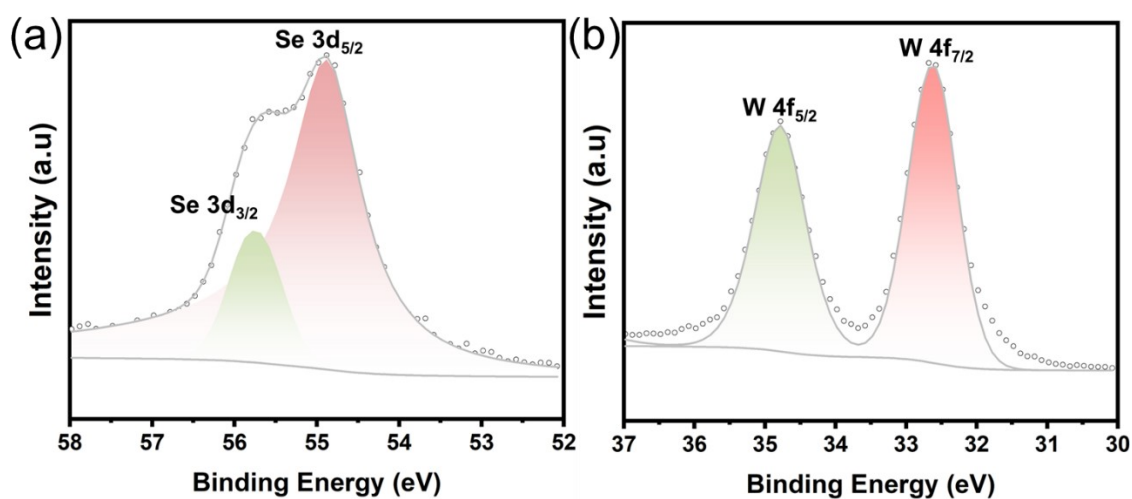

Figure S1 XPS spectra of WSe<sub>2</sub> showing the signals of (a) Se 3d, (b) W 4f.

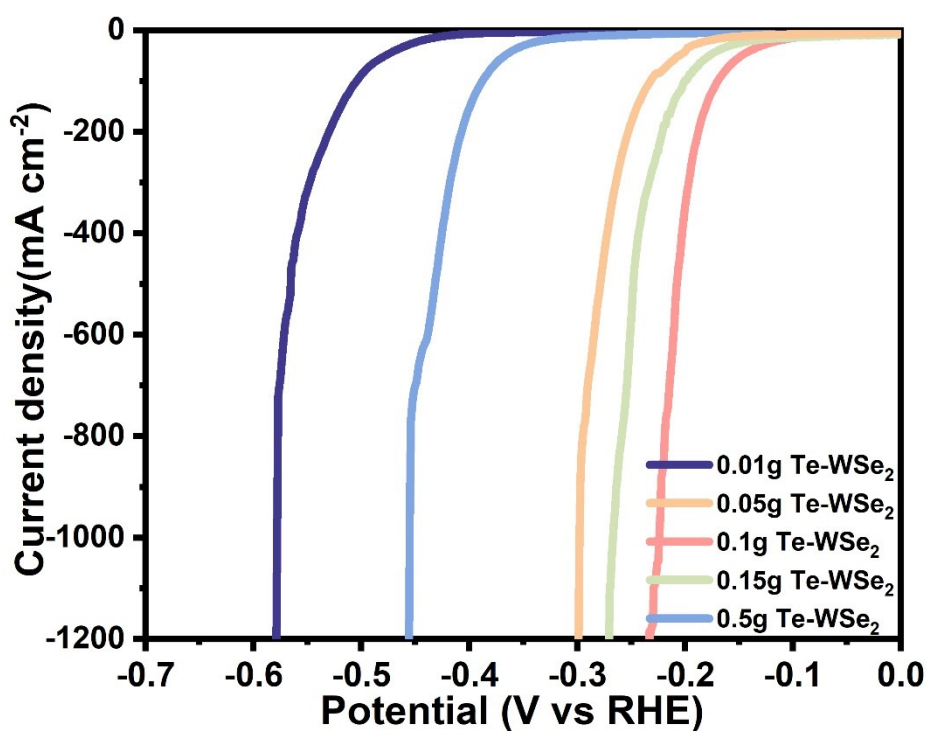

Figure S2 The polarization curves of Te-WSe<sub>2</sub> obtained by using different quantity of Te reactant.

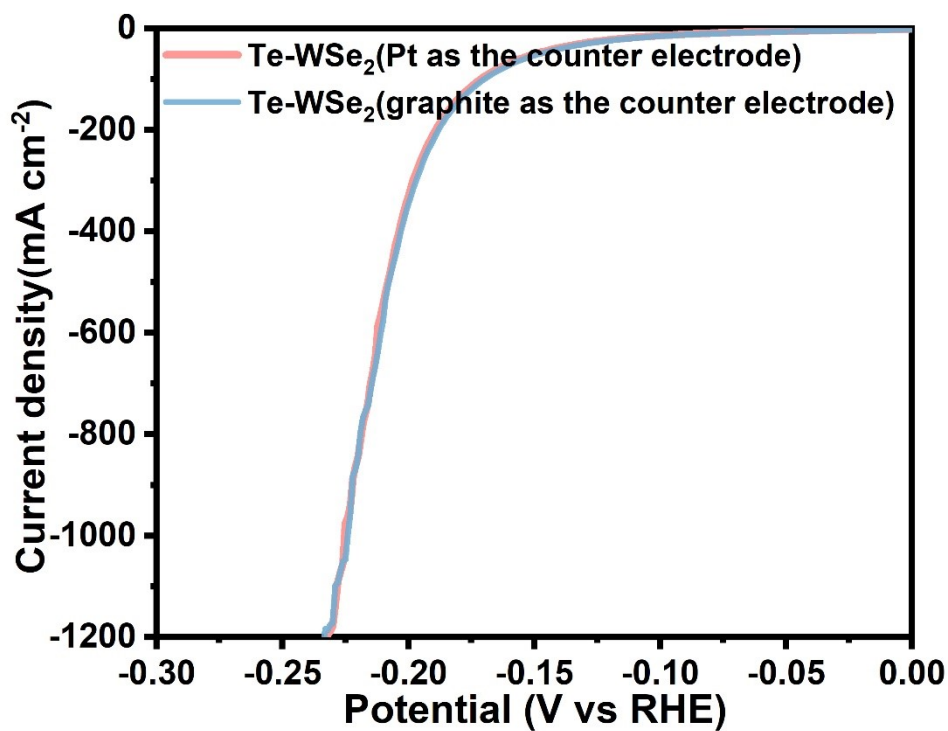

Figure S3 The polarization curves of Te-WSe<sub>2</sub> tested with different electrodes.

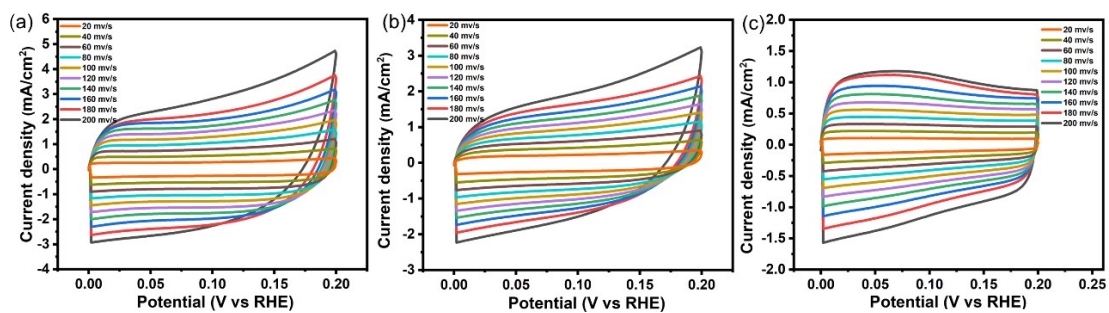

Figure S4 CV curves of Te-WSe<sub>2</sub> (a), WTe<sub>2</sub> (b) and WSe<sub>2</sub> (c) at various scan rates (20 mV s<sup>-1</sup>, 40 mV s<sup>-1</sup>, 60 mV s<sup>-1</sup>, 80 mV s<sup>-1</sup>, 100 mV s<sup>-1</sup>, 120 mV s<sup>-1</sup>, 140 mV s<sup>-1</sup>, 160 mV s<sup>-1</sup>, 180 mV s<sup>-1</sup>, 200 mV s<sup>-1</sup>) in the potential range of 0~ 0.2 (vs RHE).

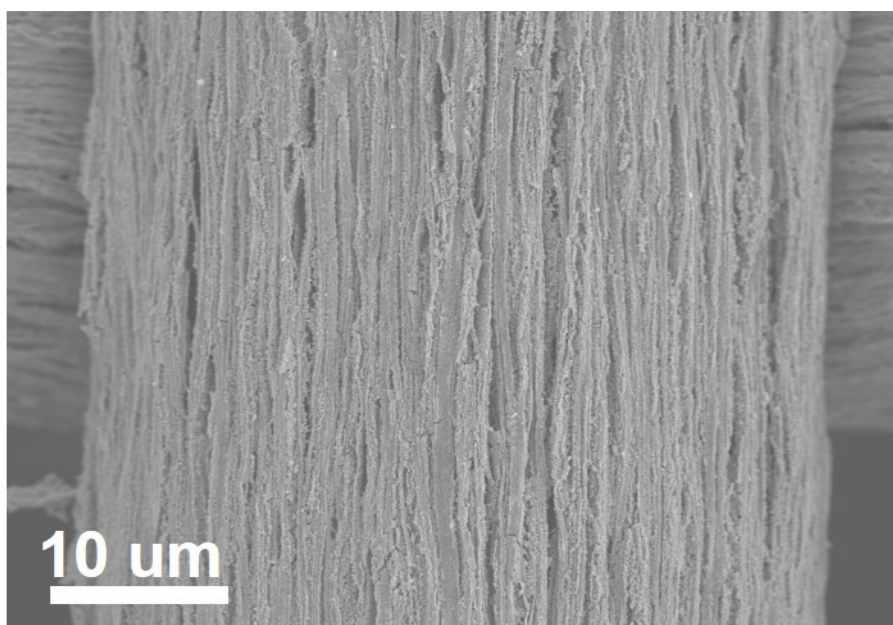

Figure S5 SEM image of the Te-WSe<sub>2</sub> after CP test.

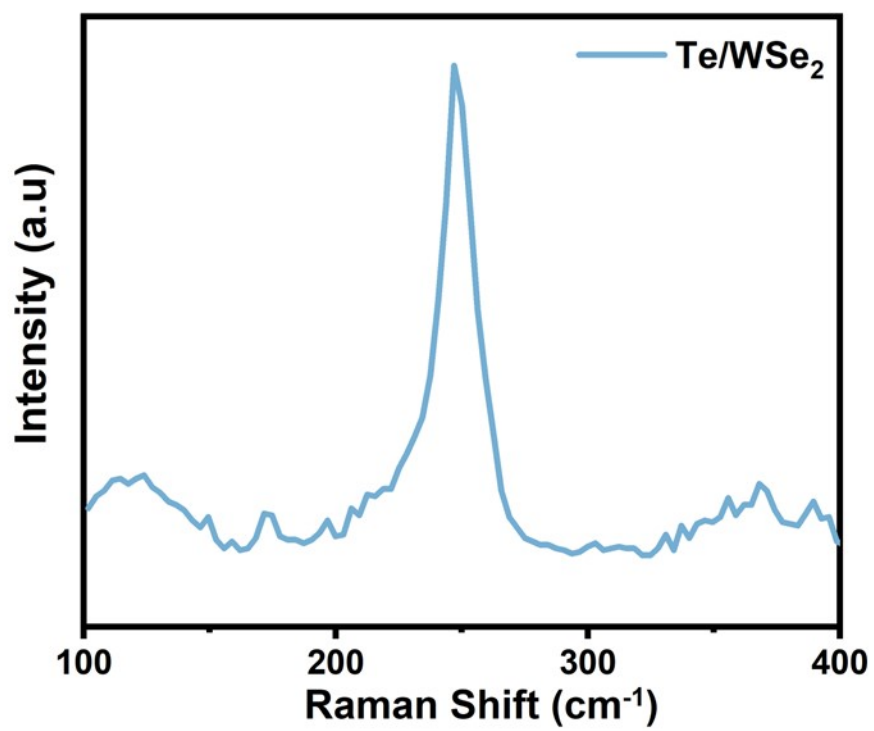

Figure S6 Raman scattering spectra of the Te-WSe<sub>2</sub> after CP test.
